# Supplementary material
Source: Springer Nature journal article supplement (https://www.springermedizin.de/resource/supplementary/12933_2012_481_MOESM3_ESM.pdf/9538676)

**A**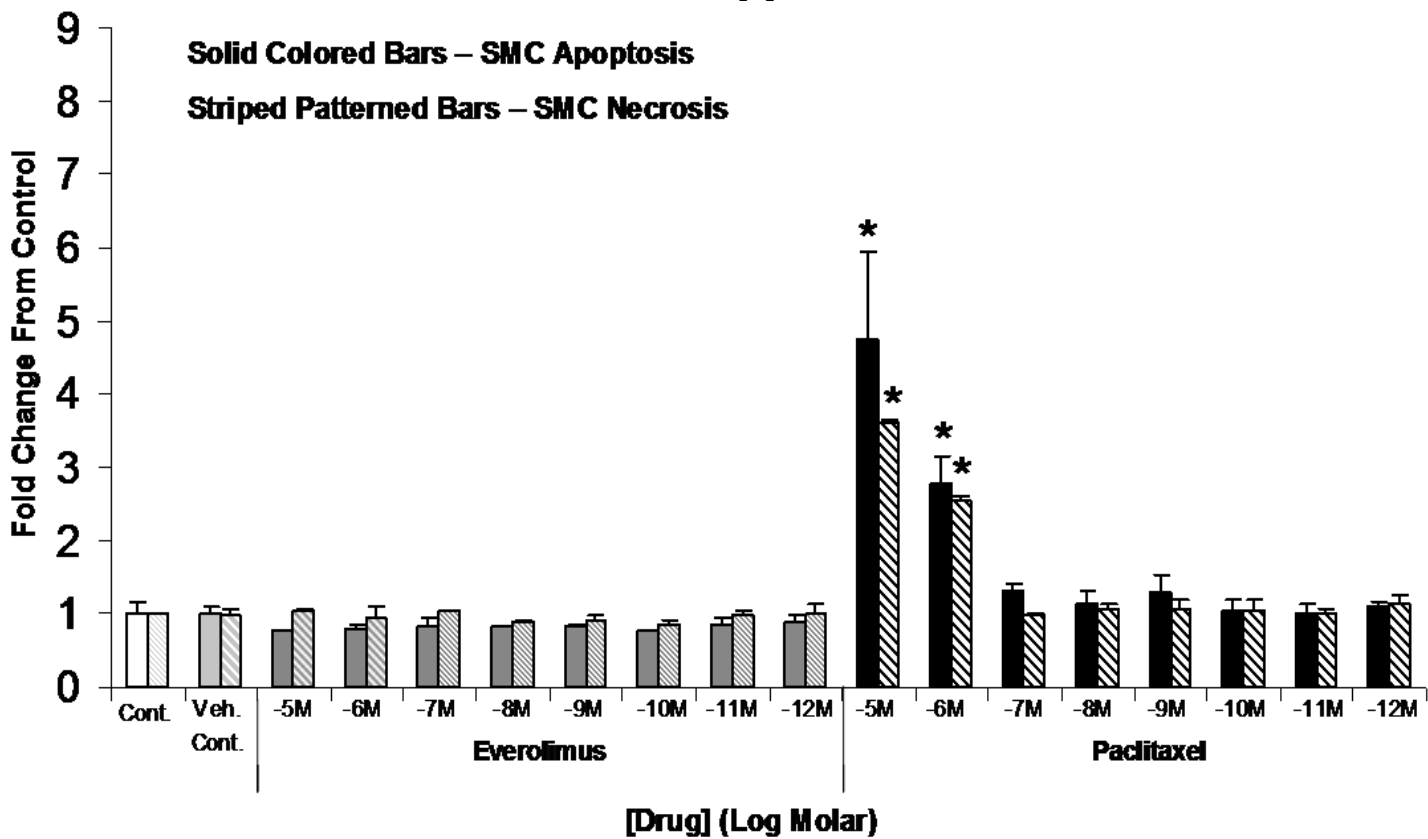**B**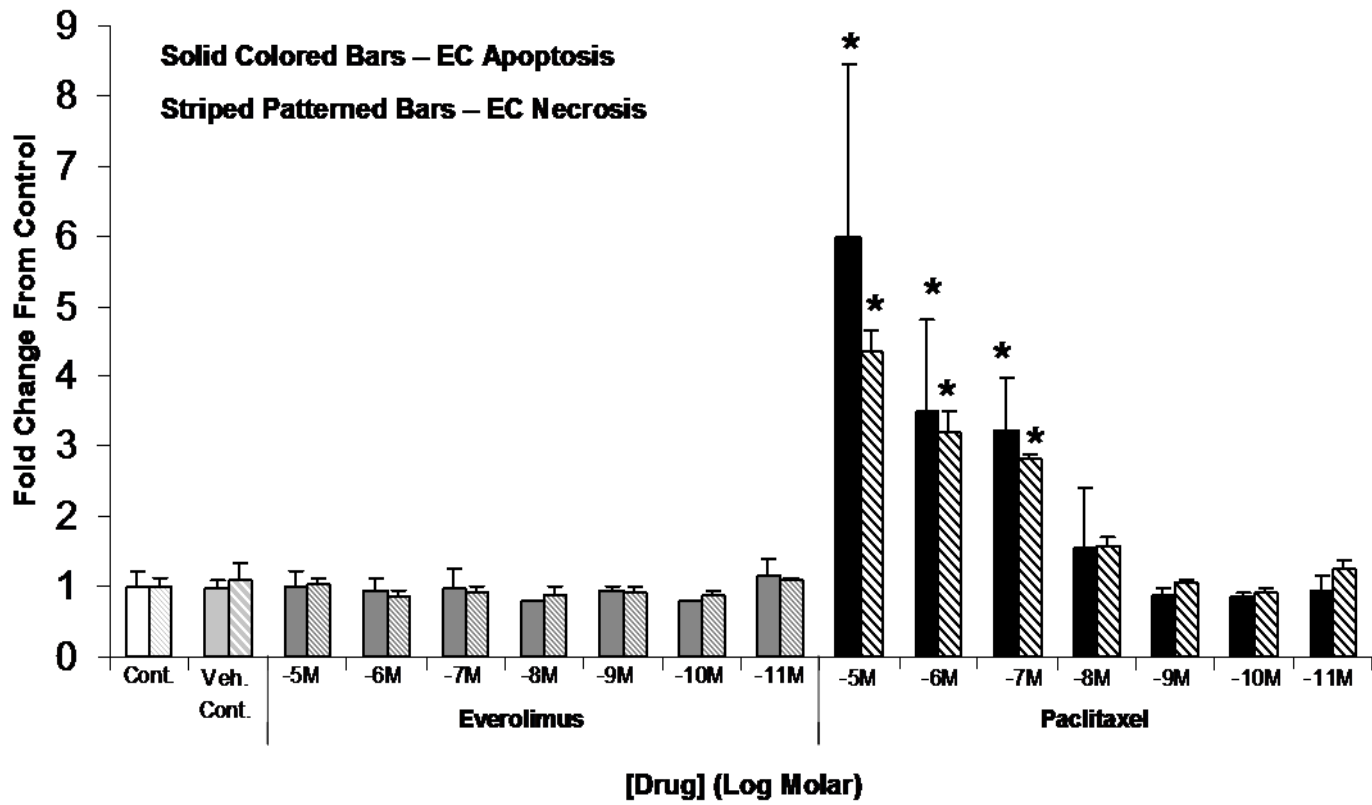

Supplement: MOESM3 [file 9538676]
